# Supplementary material for: Fine-mapping analysis including over 254,000 East Asian and European descendants identifies 136 putative colorectal cancer susceptibility genes
Source: Springer Nature journal article supplement (doi:10.1038/s41467-024-47399-x), 2024-04-26
Supplement: MOESM3 [file 41467_2024_47399_MOESM3_ESM.pdf]

## Description of Additional Supplementary Files

**Supplementary Data 1.** Colorectal cancer GWAS included in the fine-mapping analysis.

**Supplementary Data 2.** List of 143 fine-mapping genomic regions containing 205 GWAS-reported genetic variants for colorectal cancer risk.

**Supplementary Data 3.** CRC independent association signals identified through stepwise conditional analysis in trans-ancestry analyses.

**Supplementary Data 4.** CRC independent association signals identified through stepwise conditional analysis in European-ancestry populations.

**Supplementary Data 5.** CRC independent association signals identified through stepwise conditional analysis in East Asian-ancestry populations.

**Supplementary Data 6.** List of 5,741 CCVs identified in this study for CRC independent association signals.

**Supplementary Data 7.** Comparisons of CCV size for 138 independent association signals identified in both trans-ancestry and European-ancestry specific analyses.

**Supplementary Data 8.** Publicly available data used in this study for epigenomic characterization of CCVs.

**Supplementary Data 9.** Scoring hierarchy in in silico prediction approach (a modified INQUISIT).

**Supplementary Data 10.** List of 72 predicted target genes likely regulated by distal CCVs.

**Supplementary Data 11.** List of 48 predicted target genes likely regulated by proximal CCVs.

**Supplementary Data 12.** List of 19 predicted target genes for CCVs in coding region.

**Supplementary Data 13.** Significant cis-eQTLs for independent association signals.

**Supplementary Data 14.** Significant cis-mQTLs for independent association signals.

**Supplementary Data 15.** Significant colocalization between CCVs and eQTL gene identified in

trans-ancestral independent association signals.

**Supplementary Data 16.** Significant colocalization for CCVs and eQTL gene identified in European independent association signals.

**Supplementary Data 17.** Significant colocalization for CCVs and eQTL gene identified in East Asian independent association signals.

**Supplementary Data 18.** Significant colocalization for CCVs and mQTL gene identified in trans-ancestral independent association signals.

**Supplementary Data 19.** Significant colocalization for CCVs and mQTL gene identified in European independent association signals.

**Supplementary Data 20.** List of 288 non-pseudogenes targets of CCVs supported by either functional genomic data or colocalization analysis.

**Supplementary Data 21.** Differential gene expression analysis for the 136 credible target genes across nine cell types in colon tissue.

**Supplementary Data 22.** Pathways significantly enriched in the 136 credible target genes of CCVs.
